# Supplementary material for: Valence electrons in lanthanide-based single-atom magnets: a paradigm shift in 4f-magnetism modeling and design
Source: Royal Society of Chemistry journal article supplement (doi:10.1039/d0qi01148g), 2021-01-01
Supplement: d0qi01148g3.pdf [file d0qi01148g3.pdf]

## **ESI for:** Valence electrons in lanthanide-based single-atom magnets: paradigm shift in 4f-magnetism modeling and design.

Vasilii Dubrovin,<sup>a</sup> Alexey A. Popov<sup>\*a</sup> and Stanislav M. Avdoshenko<sup>\*a</sup>

<sup>a</sup>*Leibniz Institute for Solid State and Materials Research Dresden, Helmholtzstraße 20, 01069 Dresden, Germany.*

**Abstract** The detailed electronic structure of single atomic magnets is a crucial bit in the further understanding and design of a new generation of monoatomic magnetic elements on surfaces and in molecules. Control and manipulation of the single atomic state, as well as long relaxation of magnetization, have been demonstrated for lanthanide atoms on carefully chosen supporting substrates. However, these convincing experiments are puzzling by insufficient theoretical description, usually omitting the valence electrons of lanthanide atoms. In this work, starting with an idea of the inevitable need of local d- and p-shell electrons for a proper description of the magnetic states of lanthanide atoms, we rationalized the electronic structure and magnetic properties of Ho atom on the MgO substrate using ab initio multiconfigurational approaches. By doing so, we obtained the solution which complements experimental observations and has been able to pin-point the atomic state which most likely to be responsible for the exceptional magnetic properties of Ho on MgO. This study demonstrates that new paradigms are needed for understanding and interpretation of the lanthanide single-atomic magnets.

---

### Table of contents

1. Structure generation script;
2. Computational details;
3. Additional modeling data;

## 1. An example of the ASE-based python script for structure generation:

```
1
2 import numpy as np
3 from ase.io import write
4 from ase import Atoms, Atom
5 from ase.lattice.compounds import Rocksalt
6
7 ho = Atoms('Ho', positions=[[0, 0, 0]])
8
9 ii=3
10 lat=4.212
11
12 bulk = Rocksalt(size=(ii, ii, 2), symbol=("Mg", "O"), latticecon=lat, pbc=True)
13 bulk.set_pbc = [ii*lat, ii*lat, 30]
14
15 print bulk.get_cell()
16 pos = bulk.get_positions()
17 pos += np.array([-10./2., -10./2., -12.5])
18 bulk.set_positions(pos)
19
20 bulk = ho + bulk
21
22 bulk.set_cell(np.array([[ii*lat, 0., 0.],[0., ii*lat, 0.], [0., 0., 50.]])
23 bulk.pbc=[True,True,True]
24 bulk.center()
25
26
27 write('mol_mgo.pdb', bulk)
28 write('mol_mgo.ctf', bulk)
29 write('mol_mgo.xyz', bulk)
30
31 from ase.visualize import view
32 view(bulk)
33
```

## 2. Computational details for VASP DFT:

**Table SI1:** Example of VASP optimization file

|                          |
|--------------------------|
| INCAR                    |
| PREC = Normal            |
| ENMAX = 400              |
| ISMear = 0 ; SIGMA = 0.1 |
| IBRION = 1               |
| IVDW=11                  |
| LREAL=Auto               |
| NSW = 400                |
| EDIFFG = -0.005          |
| ALGO = F                 |
| NCORE= 24                |
| LORBIT=11                |
| ISPIN = 2                |

### 3. Basic DFT results for Ho|MgO system:

| Table SI2: Charges and relative energies |          |         |         |          |         |         |
|------------------------------------------|----------|---------|---------|----------|---------|---------|
| System                                   | O-site   |         |         | B-site   |         |         |
|                                          | PP, Ho3+ | PP,Er3+ | PP,Er2+ | PP, Ho3+ | PP,Er3+ | PP,Er2+ |
| $\Delta E(\text{eV})$                    | 0.00     | 0.00    | 0.00    | 0.52     | 0.49    | 0.39    |
| $\Delta q(\text{e})$                     | 0.10     | 0.10    | 0.28    | 0.71     | 0.76    | 0.35    |
| Ho-O( $\text{\AA}$ )                     | 2.07     | 2.06    | 2.19    | 1.63     | 1.62    | 2.00    |

145 atoms, Lattice="12.636 0.0 0.0 0.0 12.636 0.0 0.0 0.0 30.0"

| Table SI3: Optimized O-site structure |           |           |           |   |           |           |           |
|---------------------------------------|-----------|-----------|-----------|---|-----------|-----------|-----------|
| Ho                                    | 6.318000  | 6.318000  | 8.741266  |   |           |           |           |
| Mg                                    | 0.000000  | 0.000000  | 29.997986 | O | 0.000000  | 0.000000  | 2.096616  |
| Mg                                    | 0.000000  | 2.106059  | 2.090909  | O | 0.000000  | 2.106707  | 29.949516 |
| Mg                                    | 2.106059  | 0.000000  | 2.090909  | O | 2.106707  | 0.000000  | 29.949516 |
| Mg                                    | 2.106312  | 2.106312  | 29.999743 | O | 2.106763  | 2.106763  | 2.099111  |
| Mg                                    | 4.212536  | 0.000000  | 30.001322 | O | 4.213612  | 0.000000  | 2.099290  |
| Mg                                    | 4.210928  | 2.106755  | 2.095642  | O | 4.214085  | 2.107899  | 29.954492 |
| Mg                                    | 6.318000  | 0.000000  | 2.093215  | O | 6.318000  | 0.000000  | 29.954310 |
| Mg                                    | 6.318000  | 2.106778  | 30.001946 | O | 6.318000  | 2.112359  | 2.106445  |
| Mg                                    | 8.423464  | 0.000000  | 30.001322 | O | 8.422388  | 0.000000  | 2.099290  |
| Mg                                    | 8.425072  | 2.106755  | 2.095642  | O | 8.421915  | 2.107899  | 29.954492 |
| Mg                                    | 10.529941 | 0.000000  | 2.090909  | O | 10.529293 | 0.000000  | 29.949516 |
| Mg                                    | 10.529688 | 2.106312  | 29.999743 | O | 10.529237 | 2.106763  | 2.099111  |
| Mg                                    | 0.000000  | 4.212536  | 30.001322 | O | 0.000000  | 4.213612  | 2.099290  |
| Mg                                    | 0.000000  | 6.318000  | 2.093215  | O | 0.000000  | 6.318000  | 29.954310 |
| Mg                                    | 2.106755  | 4.210928  | 2.095642  | O | 2.107899  | 4.214085  | 29.954492 |
| Mg                                    | 2.106778  | 6.318000  | 30.001946 | O | 2.112359  | 6.318000  | 2.106445  |
| Mg                                    | 4.213033  | 4.213033  | 30.003563 | O | 4.217562  | 4.217562  | 2.111148  |
| Mg                                    | 4.209115  | 6.318000  | 2.095941  | O | 4.214490  | 6.318000  | 29.956844 |
| Mg                                    | 6.318000  | 4.209115  | 2.095941  | O | 6.318000  | 4.214490  | 29.956844 |
| Mg                                    | 6.318000  | 6.318000  | 30.000678 | O | 6.318000  | 6.318000  | 2.105825  |
| Mg                                    | 8.422967  | 4.213033  | 30.003563 | O | 8.418438  | 4.217562  | 2.111148  |
| Mg                                    | 8.426885  | 6.318000  | 2.095941  | O | 8.421510  | 6.318000  | 29.956844 |
| Mg                                    | 10.529245 | 4.210928  | 2.095642  | O | 10.528101 | 4.214085  | 29.954492 |
| Mg                                    | 10.529222 | 6.318000  | 30.001946 | O | 10.523641 | 6.318000  | 2.106445  |
| Mg                                    | 0.000000  | 8.423464  | 30.001322 | O | 0.000000  | 8.422388  | 2.099290  |
| Mg                                    | 0.000000  | 10.529941 | 2.090909  | O | 0.000000  | 10.529293 | 29.949516 |
| Mg                                    | 2.106755  | 8.425072  | 2.095642  | O | 2.107899  | 8.421915  | 29.954492 |
| Mg                                    | 2.106312  | 10.529688 | 29.999743 | O | 2.106763  | 10.529237 | 2.099111  |
| Mg                                    | 4.213033  | 8.422967  | 30.003563 | O | 4.217562  | 8.418438  | 2.111148  |
| Mg                                    | 4.210928  | 10.529245 | 2.095642  | O | 4.214085  | 10.528101 | 29.954492 |

|    |           |           |           |   |           |           |           |
|----|-----------|-----------|-----------|---|-----------|-----------|-----------|
| Mg | 6.318000  | 8.426885  | 2.095941  | O | 6.318000  | 8.421510  | 29.956844 |
| Mg | 6.318000  | 10.529222 | 30.001946 | O | 6.318000  | 10.523641 | 2.106445  |
| Mg | 8.422967  | 8.422967  | 30.003563 | O | 8.418438  | 8.418438  | 2.111148  |
| Mg | 8.425072  | 10.529245 | 2.095642  | O | 8.421915  | 10.528101 | 29.954492 |
| Mg | 10.529245 | 8.425072  | 2.095642  | O | 10.528101 | 8.421915  | 29.954492 |
| Mg | 10.529688 | 10.529688 | 29.999743 | O | 10.529237 | 10.529237 | 2.099111  |
| Mg | 0.000000  | 0.000000  | 4.207293  | O | 0.000000  | 0.000000  | 6.349656  |
| Mg | 0.000000  | 2.099898  | 6.302523  | O | 0.000000  | 2.104675  | 4.200330  |
| Mg | 2.099898  | 0.000000  | 6.302523  | O | 2.104675  | 0.000000  | 4.200330  |
| Mg | 2.104835  | 2.104835  | 4.209318  | O | 2.100367  | 2.100367  | 6.350844  |
| Mg | 4.210876  | 0.000000  | 4.210258  | O | 4.203615  | 0.000000  | 6.350402  |
| Mg | 4.197407  | 2.091491  | 6.309551  | O | 4.213570  | 2.105212  | 4.204366  |
| Mg | 6.318000  | 0.000000  | 6.303501  | O | 6.318000  | 0.000000  | 4.197187  |
| Mg | 6.318000  | 2.096376  | 4.210279  | O | 6.318000  | 2.070342  | 6.339797  |
| Mg | 8.425124  | 0.000000  | 4.210258  | O | 8.432385  | 0.000000  | 6.350402  |
| Mg | 8.438593  | 2.091491  | 6.309551  | O | 8.422430  | 2.105212  | 4.204366  |
| Mg | 10.536102 | 0.000000  | 6.302523  | O | 10.531325 | 0.000000  | 4.200330  |
| Mg | 10.531165 | 2.104835  | 4.209318  | O | 10.535633 | 2.100367  | 6.350844  |
| Mg | 0.000000  | 4.210876  | 4.210258  | O | 0.000000  | 4.203615  | 6.350402  |
| Mg | 0.000000  | 6.318000  | 6.303501  | O | 0.000000  | 6.318000  | 4.197187  |
| Mg | 2.091491  | 4.197407  | 6.309551  | O | 2.105212  | 4.213570  | 4.204366  |
| Mg | 2.096376  | 6.318000  | 4.210279  | O | 2.070342  | 6.318000  | 6.339797  |
| Mg | 4.211533  | 4.211533  | 4.228113  | O | 4.204398  | 4.204398  | 6.342846  |
| Mg | 4.098708  | 6.318000  | 6.351775  | O | 4.235539  | 6.318000  | 4.247107  |
| Mg | 6.318000  | 4.098708  | 6.351775  | O | 6.318000  | 4.235539  | 4.247107  |
| Mg | 6.318000  | 6.318000  | 4.169284  | O | 6.318000  | 6.318000  | 6.681078  |
| Mg | 8.424467  | 4.211533  | 4.228113  | O | 8.431602  | 4.204398  | 6.342846  |
| Mg | 8.537292  | 6.318000  | 6.351775  | O | 8.400461  | 6.318000  | 4.247107  |
| Mg | 10.544509 | 4.197407  | 6.309551  | O | 10.530788 | 4.213570  | 4.204366  |
| Mg | 10.539624 | 6.318000  | 4.210279  | O | 10.565658 | 6.318000  | 6.339797  |
| Mg | 0.000000  | 8.425124  | 4.210258  | O | 0.000000  | 8.432385  | 6.350402  |
| Mg | 0.000000  | 10.536102 | 6.302523  | O | 0.000000  | 10.531325 | 4.200330  |
| Mg | 2.091491  | 8.438593  | 6.309551  | O | 2.105212  | 8.422430  | 4.204366  |
| Mg | 2.104835  | 10.531165 | 4.209318  | O | 2.100367  | 10.535633 | 6.350844  |
| Mg | 4.211533  | 8.424467  | 4.228113  | O | 4.204398  | 8.431602  | 6.342846  |
| Mg | 4.197407  | 10.544509 | 6.309551  | O | 4.213570  | 10.530788 | 4.204366  |
| Mg | 6.318000  | 8.537292  | 6.351775  | O | 6.318000  | 8.400461  | 4.247107  |
| Mg | 6.318000  | 10.539624 | 4.210279  | O | 6.318000  | 10.565658 | 6.339797  |
| Mg | 8.424467  | 8.424467  | 4.228113  | O | 8.431602  | 8.431602  | 6.342846  |
| Mg | 8.438593  | 10.544509 | 6.309551  | O | 8.422430  | 10.530788 | 4.204366  |
| Mg | 10.544509 | 8.438593  | 6.309551  | O | 10.530788 | 8.422430  | 4.204366  |

|    |           |           |          |   |           |           |          |
|----|-----------|-----------|----------|---|-----------|-----------|----------|
| Mg | 10.531165 | 10.531165 | 4.209318 | O | 10.535633 | 10.535633 | 6.350844 |
|----|-----------|-----------|----------|---|-----------|-----------|----------|

| Table S14: Optimized B-site structure |           |           |           |   |           |           |           |
|---------------------------------------|-----------|-----------|-----------|---|-----------|-----------|-----------|
| Ho                                    | 5.246813  | 7.388927  | 8.512234  |   |           |           |           |
| Mg                                    | 0.000367  | -0.000762 | 29.987520 | O | 0.003656  | -0.004130 | 2.104713  |
| Mg                                    | -0.002307 | 2.103582  | 2.085206  | O | -0.000538 | 2.104843  | 29.957737 |
| Mg                                    | 2.105998  | -0.005973 | 2.088401  | O | 2.107589  | -0.004068 | 29.959617 |
| Mg                                    | 2.103164  | 2.102312  | 29.988749 | O | 2.107738  | 2.102339  | 2.104598  |
| Mg                                    | 4.211182  | -0.000833 | 29.983745 | O | 4.214799  | -0.012479 | 2.110468  |
| Mg                                    | 4.210295  | 2.098560  | 2.083886  | O | 4.212860  | 2.104275  | 29.960686 |
| Mg                                    | 6.319351  | 0.006294  | 2.084343  | O | 6.317498  | 0.000758  | 29.959668 |
| Mg                                    | 6.319031  | 2.105647  | 29.983910 | O | 6.315570  | 2.117645  | 2.110712  |
| Mg                                    | 8.426058  | 0.003240  | 29.988636 | O | 8.420890  | 0.003215  | 2.104670  |
| Mg                                    | 8.423274  | 2.111423  | 2.088858  | O | 8.421254  | 2.109069  | 29.960130 |
| Mg                                    | 10.532007 | 0.001928  | 2.085180  | O | 10.530714 | 0.000105  | 29.957705 |
| Mg                                    | 10.529642 | 2.105954  | 29.988556 | O | 10.525994 | 2.109565  | 2.105292  |
| Mg                                    | -0.003679 | 4.209472  | 29.988690 | O | -0.003653 | 4.214650  | 2.104735  |
| Mg                                    | -0.006714 | 6.316175  | 2.084377  | O | -0.001273 | 6.317999  | 29.959686 |
| Mg                                    | 2.100516  | 4.206825  | 2.084105  | O | 2.105902  | 4.212547  | 29.960563 |
| Mg                                    | 2.100161  | 6.315062  | 29.976683 | O | 2.113962  | 6.322491  | 2.111201  |
| Mg                                    | 4.209467  | 4.206485  | 29.977571 | O | 4.217369  | 4.220772  | 2.111732  |
| Mg                                    | 4.203530  | 6.309737  | 2.051307  | O | 4.211024  | 6.316191  | 29.944816 |
| Mg                                    | 6.318094  | 4.207951  | 2.071106  | O | 6.315872  | 4.214195  | 29.953265 |
| Mg                                    | 6.318908  | 6.316700  | 29.962272 | O | 6.310819  | 6.324756  | 2.089488  |
| Mg                                    | 8.424330  | 4.211241  | 29.983065 | O | 8.411172  | 4.224411  | 2.115123  |
| Mg                                    | 8.427644  | 6.317514  | 2.071126  | O | 8.421370  | 6.319686  | 29.953297 |
| Mg                                    | 10.524171 | 4.212304  | 2.088890  | O | 10.526495 | 4.214284  | 29.960143 |
| Mg                                    | 10.529869 | 6.316410  | 29.983955 | O | 10.517896 | 6.319970  | 2.110732  |
| Mg                                    | 0.000001  | 8.424263  | 29.983649 | O | 0.011893  | 8.420675  | 2.110459  |
| Mg                                    | 0.005400  | 10.529435 | 2.088384  | O | 0.003551  | 10.527926 | 29.959590 |
| Mg                                    | 2.101436  | 8.424001  | 2.071744  | O | 2.107199  | 8.421283  | 29.953306 |
| Mg                                    | 2.104823  | 10.530566 | 29.982990 | O | 2.117378  | 10.518042 | 2.114609  |
| Mg                                    | 4.210377  | 8.424950  | 29.963658 | O | 4.219172  | 8.416269  | 2.089468  |
| Mg                                    | 4.211462  | 10.533911 | 2.071760  | O | 4.214172  | 10.528259 | 29.953296 |
| Mg                                    | 6.325813  | 8.432061  | 2.051314  | O | 6.319315  | 8.424494  | 29.945032 |
| Mg                                    | 6.320447  | 10.535349 | 29.976768 | O | 6.312988  | 10.521560 | 2.111160  |
| Mg                                    | 8.429103  | 8.426143  | 29.977578 | O | 8.414798  | 8.418215  | 2.111711  |
| Mg                                    | 8.428720  | 10.535114 | 2.084075  | O | 8.423007  | 10.529651 | 29.960517 |
| Mg                                    | 10.536965 | 8.425282  | 2.083893  | O | 10.531243 | 8.422726  | 29.960645 |
| Mg                                    | 10.533257 | 10.532502 | 29.988705 | O | 10.533203 | 10.527848 | 2.104582  |

|    |           |           |          |   |           |           |          |
|----|-----------|-----------|----------|---|-----------|-----------|----------|
| Mg | 0.002147  | -0.002615 | 4.206672 | O | 0.003772  | -0.004306 | 6.353104 |
| Mg | -0.011297 | 2.095650  | 6.308388 | O | -0.002618 | 2.103542  | 4.205294 |
| Mg | 2.096001  | 0.001937  | 6.316553 | O | 2.113467  | -0.013063 | 4.214448 |
| Mg | 2.100179  | 2.096055  | 4.204036 | O | 2.094768  | 2.093653  | 6.350382 |
| Mg | 4.211936  | -0.002145 | 4.212734 | O | 4.212486  | 0.006363  | 6.364681 |
| Mg | 4.196410  | 2.084225  | 6.307437 | O | 4.214770  | 2.096475  | 4.203684 |
| Mg | 6.333239  | 0.019702  | 6.307303 | O | 6.315644  | 0.008208  | 4.203661 |
| Mg | 6.317524  | 2.106461  | 4.212663 | O | 6.317966  | 2.097327  | 6.365249 |
| Mg | 8.428805  | 0.009579  | 4.203931 | O | 8.433944  | 0.012073  | 6.350054 |
| Mg | 8.432231  | 2.103370  | 6.317214 | O | 8.414622  | 2.119349  | 4.215670 |
| Mg | 10.539788 | 0.010725  | 6.308329 | O | 10.531953 | 0.002122  | 4.205279 |
| Mg | 10.527231 | 2.108329  | 4.206907 | O | 10.524120 | 2.111377  | 6.353899 |
| Mg | -0.009969 | 4.206712  | 4.203974 | O | -0.012574 | 4.201586  | 6.350088 |
| Mg | -0.020248 | 6.302336  | 6.307296 | O | -0.008678 | 6.319853  | 4.203696 |
| Mg | 2.057896  | 4.164387  | 6.306832 | O | 2.105913  | 4.212385  | 4.204466 |
| Mg | 2.074309  | 6.312856  | 4.197447 | O | 2.059808  | 6.303121  | 6.321442 |
| Mg | 4.207284  | 4.180049  | 4.197045 | O | 4.199992  | 4.163731  | 6.322405 |
| Mg | 4.052211  | 6.155016  | 6.261185 | O | 4.238147  | 6.344172  | 4.258937 |
| Mg | 6.308232  | 4.146326  | 6.373767 | O | 6.307029  | 4.257514  | 4.262236 |
| Mg | 6.315491  | 6.320092  | 4.115238 | O | 6.228462  | 6.407067  | 6.885978 |
| Mg | 8.414822  | 4.220755  | 4.229094 | O | 8.394817  | 4.240754  | 6.381284 |
| Mg | 8.489253  | 6.327351  | 6.373747 | O | 8.378052  | 6.328539  | 4.262269 |
| Mg | 10.532195 | 4.203195  | 6.317197 | O | 10.516196 | 4.220918  | 4.215688 |
| Mg | 10.529138 | 6.317964  | 4.212700 | O | 10.538210 | 6.317575  | 6.365246 |
| Mg | 0.001616  | 8.423587  | 4.212732 | O | -0.006919 | 8.423002  | 6.364711 |
| Mg | -0.002414 | 10.539548 | 6.316571 | O | 0.012588  | 10.522020 | 4.214452 |
| Mg | 2.042881  | 8.416642  | 6.373601 | O | 2.150505  | 8.413161  | 4.260385 |
| Mg | 2.113266  | 10.522116 | 4.228426 | O | 2.128760  | 10.506693 | 6.377623 |
| Mg | 4.212679  | 8.422712  | 4.117899 | O | 4.276002  | 8.359692  | 6.875814 |
| Mg | 4.218833  | 10.592545 | 6.373587 | O | 4.222299  | 10.484943 | 4.260366 |
| Mg | 6.480422  | 8.583409  | 6.261020 | O | 6.291308  | 8.397414  | 4.258871 |
| Mg | 6.322467  | 10.561302 | 4.197354 | O | 6.332371  | 10.575754 | 6.321371 |
| Mg | 8.455475  | 8.428321  | 4.197012 | O | 8.471720  | 8.435574  | 6.322374 |
| Mg | 8.471076  | 10.577585 | 6.306698 | O | 8.423073  | 10.529649 | 4.204426 |
| Mg | 10.551236 | 8.439156  | 6.307481 | O | 10.539002 | 8.420803  | 4.203699 |
| Mg | 10.539340 | 10.535360 | 4.203983 | O | 10.541826 | 10.540743 | 6.350341 |

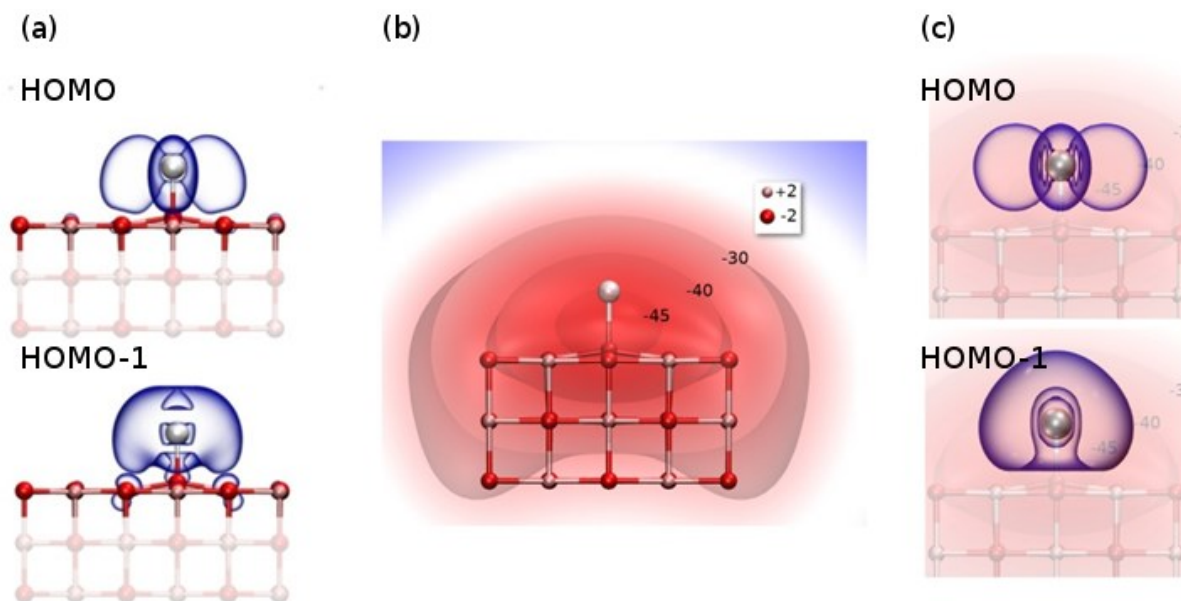

**Figure S1** Molecular orbital densities of HOMO and HOMO-1 MOs obtained in full VASP/DFT/PBE consideration of the Ho|MgO system (a) and for single atom(Lu) modeling Lu|MgO at ORCA/DFT/PBE/SARC-DKH-TZVP (c), where MgO surfaces substituted by point charges with electrostatic potential (units  $k(T=300K)/e$  or 25 mV) (b).

**Animation SI1**

Evolution of natural spin densities for 149 SOC-states in modeling at RASSCF( $[4f^{10}, (5d + 6p)^1]$ )/RASSI-SO/QZVP-RCC level.

**Animation SI2**

Evolution of natural spin densities for 120 SOC-states in modeling at RASSCF( $[4f^{10}, (6p)^1]$ )/RASSI-SO/QZVP-RCC level.
